# Supplementary material for: Conserved transcriptional connectivity of regulatory T cells in the tumor microenvironment informs new combination cancer therapy strategies
Source: PubMed Central journal article supplement (PMC10232368; doi:10.1038/s41590-023-01504-2), 2023-05-01
Supplement: 41590_2023_1504_MOESM2_ESM.pdf [file 41590_2023_1504_MOESM2_ESM.pdf]

## Reporting Summary

Nature Research wishes to improve the reproducibility of the work that we publish. This form provides structure for consistency and transparency in reporting. For further information on Nature Research policies, see our [Editorial Policies](#) and the [Editorial Policy Checklist](#).

### Statistics

For all statistical analyses, confirm that the following items are present in the figure legend, table legend, main text, or Methods section.

n/a Confirmed

- The exact sample size ( $n$ ) for each experimental group/condition, given as a discrete number and unit of measurement
- A statement on whether measurements were taken from distinct samples or whether the same sample was measured repeatedly
- The statistical test(s) used AND whether they are one- or two-sided  
*Only common tests should be described solely by name; describe more complex techniques in the Methods section.*
- A description of all covariates tested
- A description of any assumptions or corrections, such as tests of normality and adjustment for multiple comparisons
- A full description of the statistical parameters including central tendency (e.g. means) or other basic estimates (e.g. regression coefficient) AND variation (e.g. standard deviation) or associated estimates of uncertainty (e.g. confidence intervals)
- For null hypothesis testing, the test statistic (e.g.  $F$ ,  $t$ ,  $r$ ) with confidence intervals, effect sizes, degrees of freedom and  $P$  value noted  
*Give  $P$  values as exact values whenever suitable.*
- For Bayesian analysis, information on the choice of priors and Markov chain Monte Carlo settings
- For hierarchical and complex designs, identification of the appropriate level for tests and full reporting of outcomes
- Estimates of effect sizes (e.g. Cohen's  $d$ , Pearson's  $r$ ), indicating how they were calculated

*Our web collection on [statistics for biologists](#) contains articles on many of the points above.*

### Software and code

Policy information about [availability of computer code](#)

#### Data collection

Flow cytometry data were collected on an LSRII using FACS Diva v8.0 (BD), or on Aurora using SpectroFlo v2.2.0.3 (Cytek)  
Bulk RNA-seq libraries were sequenced on HiSeq (Illumina).  
scRNA-seq libraries were sequenced on NovaSeq (Illumina).

#### Data analysis

Flow cytometry data were analyzed using FlowJo v 10.6.1 (BD)  
GraphPad Prism v9 was used for statistical analysis  
All Images were processed and analyzed using ImageJ package v2.0.0-rc-69/1.52p  
For bulk RNA sequencing STAR aligner v2.7.3a was used for alignment. R v3.6.0 was used for generating count matrices and DESeq2 was used for Principal Component Analysis, to identify differentially expressed genes and for Spearman correlations calculations and for hierarchical clustering and generation of K-means heatmaps.  
scRNA-seq data analysis was performed using custom code relying primarily in Python v3.8.11 using Scanpy v1.8.1 package for basic pre-processing and analysis. Visualization of the data was done using MulticoreTSNE v0.1 implementation of tSNE in Python and clustering was done using PhenoGraph v1.5.7 package in Python. Factor analysis was done using schPF v0.5.0 implementation in Python v3.7.11.  
Differential abundance testing between scRNA-seq conditions was performed using Milo v1.3.4.  
Identification of factors (Hungarian matching algorithm) was implemented using the linear\_sum\_assignment module in optimize submodule of scipy package (v1.7.1) in Python (v3.8).  
For human factor analysis, Spearman correlation coefficients and p values were calculated in R using ggpubr (0.4.0) and results were visualized using ggplot2 v3.3.5.

For manuscripts utilizing custom algorithms or software that are central to the research but not yet described in published literature, software must be made available to editors and reviewers. We strongly encourage code deposition in a community repository (e.g. GitHub). See the Nature Research [guidelines for submitting code & software](#) for further information.

## Data

Policy information about [availability of data](#)

All manuscripts must include a [data availability statement](#). This statement should provide the following information, where applicable:

- Accession codes, unique identifiers, or web links for publicly available datasets
- A list of figures that have associated raw data
- A description of any restrictions on data availability

Raw and processed bulk, single cell RNA-seq, and Visium data from mouse are available from Gene Expression Omnibus (GEO) at super series accession GSE202159. Human tumor scRNA-seq data is available at the Human Tumor Atlas Network (HTAN) data coordinating center web platform ([data.humantumoratlas.org](http://data.humantumoratlas.org)).

## Field-specific reporting

Please select the one below that is the best fit for your research. If you are not sure, read the appropriate sections before making your selection.

- Life sciences       Behavioural & social sciences       Ecological, evolutionary & environmental sciences

For a reference copy of the document with all sections, see [nature.com/documents/nr-reporting-summary-flat.pdf](https://nature.com/documents/nr-reporting-summary-flat.pdf)

## Life sciences study design

All studies must disclose on these points even when the disclosure is negative.

|                 |                                                                                                                                                                                                                                                                                                                                                                                               |
|-----------------|-----------------------------------------------------------------------------------------------------------------------------------------------------------------------------------------------------------------------------------------------------------------------------------------------------------------------------------------------------------------------------------------------|
| Sample size     | No statistical methods were used to pre-determine sample sizes but our sample sizes are similar to those reported in previous publications 5,13. Human sample size was based on the largest amount of patient samples available from the HTAN study collection that were primary LuAD or local met.                                                                                           |
| Data exclusions | In human factor analysis only samples with sufficient cell numbers (Fibroblast > 5, Endothelial > 5, Myeloid > 20) in a given lineage were used for association of factor usage to Treg proportion. Additionally, one sample with high IFN activation and another with low cell numbers and inconsistent factor estimates within the endothelial lineage were removed from the same analysis. |
| Replication     | All experiments in the study were performed at least twice with consistent results except for single cell sequencing and spatial transcriptomics, where no repetition is customary in the field 54, 72.                                                                                                                                                                                       |
| Randomization   | Mice were sex and age matched. Mice were allocated randomly to experimental groups. Only continuous trends between cell proportion and factor use were assessed across all patients and therefore controls based on sample groupings are not relevant.                                                                                                                                        |
| Blinding        | Data collection and analysis were not performed blind to the conditions of the experiments. It is customary in the field that no blinding is needed 5,13.                                                                                                                                                                                                                                     |

## Reporting for specific materials, systems and methods

We require information from authors about some types of materials, experimental systems and methods used in many studies. Here, indicate whether each material, system or method listed is relevant to your study. If you are not sure if a list item applies to your research, read the appropriate section before selecting a response.

### Materials & experimental systems

| n/a                                 | Involved in the study                                           |
|-------------------------------------|-----------------------------------------------------------------|
| <input type="checkbox"/>            | <input checked="" type="checkbox"/> Antibodies                  |
| <input checked="" type="checkbox"/> | <input type="checkbox"/> Eukaryotic cell lines                  |
| <input checked="" type="checkbox"/> | <input type="checkbox"/> Palaeontology and archaeology          |
| <input type="checkbox"/>            | <input checked="" type="checkbox"/> Animals and other organisms |
| <input type="checkbox"/>            | <input checked="" type="checkbox"/> Human research participants |
| <input checked="" type="checkbox"/> | <input type="checkbox"/> Clinical data                          |
| <input checked="" type="checkbox"/> | <input type="checkbox"/> Dual use research of concern           |

### Methods

| n/a                                 | Involved in the study                              |
|-------------------------------------|----------------------------------------------------|
| <input checked="" type="checkbox"/> | <input type="checkbox"/> ChIP-seq                  |
| <input type="checkbox"/>            | <input checked="" type="checkbox"/> Flow cytometry |
| <input checked="" type="checkbox"/> | <input type="checkbox"/> MRI-based neuroimaging    |

## Antibodies

Antibodies used

For immunofluorescence, the following antibody conjugates were used:  
 Ab supplier cat #  
 GFP-AF488 ThermoFisher A12311  
 CD3-AF532 ThermoFisher 58-0032-82  
 CD4-AF647 BioLegend 100530  
 TCRβ-PE ThermoFisher 12-5961-83

GP38-PE-Cy7 BioLegend 127412  
 Lyve-1-APC R&D Systems FAB2125A  
 CD11c AF594 BioLegend 117346  
 F4/80-AF647 Tonbo Bioscience #20-4801-U100

For flow cytometry, the following antibody conjugates were used:

Ab supplier cat #  
 CD45-BV510 BioLegend 103137  
 CD45-BV570 BioLegend 103136  
 TCR $\beta$ -PE-eFluor610 ThermoFisher 61-5961-82  
 CD3-PerCP-Cy5.5 Tonbo Bioscience 65-0031-U100  
 CD3-BV650 BioLegend 100229  
 CD4-PerCP-Cy5.5 Tonbo Bioscience 65-0042-U100  
 CD4-ef450, ThermoFisher 48-0042-82  
 CD4-BV510 BioLegend 100553  
 CD8a-BV605 BioLegend 100744  
 CD8a-PE-e610 ThermoFisher 61-0081-82  
 CD8-BV711 BioLegend 100759  
 CD31-PE BioLegend 102508  
 EPCAM-AF647 BioLegend 118212  
 GP38-PE-Cy7 BioLegend 127412  
 CD11b-BV605 BioLegend 101257  
 CD11b-BV480 BD Biosciences 566117  
 CD11c-APC BD Biosciences 550261  
 CD11c-BV605 BioLegend 117334  
 GR1-FITC, ThermoFisher 11-5931-82  
 GR1-AF532 ThermoFisher 58-5931-82  
 MHCII-redfluor710 Tonbo Bioscience 80-5321-U100  
 TER-119-FITC, ThermoFisher 11-5921-82  
 B220-BUV496 BD Biosciences 564662  
 F4/80-APC Tonbo Bioscience 20-4801-U100  
 CD44-ef450 ThermoFisher 48-0441-82  
 CD62L-BV605 BioLegend 104438  
 KI67-AF700 BioLegend 652420  
 IFN $\gamma$ -ef450 Tonbo Bioscience 755-7311-U100  
 TNFa-BV605 BioLegend 506329  
 NK1.1-APC-eF780 ThermoFisher 47-5941-82  
 CD64-APC BioLegend 139306  
 Ly6G-PE-Cy7 BioLegend 127618  
 CD19-PE-Cy5 BioLegend 115510  
 Ly6C-BV711 BioLegend 128037  
 Siglec-F-BV421 BD Biosciences 562681  
 CCR8-AF-647 BioLegend 150303  
 CCR8-PE R&D FAB8324P025

For in- vivo experiments, the following antibodies were used

Ctrl IgG BioXcell BE0130  
 anti CCR8 BioLegend 150302  
 anti VEGF R&D AF-493-M

#### Validation

All above antibodies were well validated commercial clones or preps routinely QC'ed by the manufacturer. Please refer to the spec sheets on the respective vendors' website for technical information and detail by searching the catalog numbers provided.

## Animals and other organisms

Policy information about [studies involving animals](#); [ARRIVE guidelines](#) recommended for reporting animal research

#### Laboratory animals

Animals were housed at the Memorial Sloan Kettering Cancer Center (MSKCC) animal facility under specific pathogen free (SPF) conditions according to institutional guidelines. Mice used in this study had no previous history of experimentation or exposure to drugs. Adult male and female mice (6 weeks or older) were used for all experiments. genetic strains used were Foxp3GFP-DTR and KrasLSL-G12D Trp53fl/fl. 10,13.

#### Wild animals

No wild animals were used in this study.

#### Field-collected samples

No field collected samples were used in this study.

#### Ethics oversight

All studies were performed under protocol 08-10-023 and approved by the MSKCC Institutional Animal Care and Use Committee

Note that full information on the approval of the study protocol must also be provided in the manuscript.

## Human research participants

Policy information about [studies involving human research participants](#)

|                            |                                                                                                                                                                                                                                                                                                                                                                                                                                                                                                                                                                                                                                                                                                       |
|----------------------------|-------------------------------------------------------------------------------------------------------------------------------------------------------------------------------------------------------------------------------------------------------------------------------------------------------------------------------------------------------------------------------------------------------------------------------------------------------------------------------------------------------------------------------------------------------------------------------------------------------------------------------------------------------------------------------------------------------|
| Population characteristics | Metadata for patient tumor samples including race, gender, and other characteristics can be found in Supplementary Table 17.                                                                                                                                                                                                                                                                                                                                                                                                                                                                                                                                                                          |
| Recruitment                | Patients with lung adenocarcinoma undergoing a surgical resection or tissue biopsy at Memorial Sloan Kettering Cancer Center (MSKCC) were identified and biospecimens collected prospectively from 2017 to 2020. All patients from whom biospecimens were obtained provided informed consent for an MSKCC-wide biospecimen collection and analysis protocol. Recruitment was designed to capture a wide, unbiased swath of heterogeneous disease, with a slight emphasis on EGFR-mutated tumors with a high propensity to transform to more aggressive subtypes. Biases may be present related to this recruitment design, the race, sex, smoking status and the general patient population of MSKCC. |
| Ethics oversight           | Use of all patient material and data described in this manuscript was performed under ethical approval obtained from the Memorial Sloan Kettering Cancer Center Institutional Review Board (Study numbers: 06-107 and 12-245).                                                                                                                                                                                                                                                                                                                                                                                                                                                                        |

Note that full information on the approval of the study protocol must also be provided in the manuscript.

## Flow Cytometry

### Plots

Confirm that:

- The axis labels state the marker and fluorochrome used (e.g. CD4-FITC).
- The axis scales are clearly visible. Include numbers along axes only for bottom left plot of group (a 'group' is an analysis of identical markers).
- All plots are contour plots with outliers or pseudocolor plots.
- A numerical value for number of cells or percentage (with statistics) is provided.

### Methodology

|                           |                                                                                                                                                                                                                                                                                                                                                                                                                                                                                                                                                                                                                                                                                                                                                                                                                                                                                                                                                                                                                                                                                                                                                                                                                                                                                                                                                                                                                                                                                                                                                                                                                                                                                                                                                                                                                                                                                                                                                                                                                                                                                                                                                                                                         |
|---------------------------|---------------------------------------------------------------------------------------------------------------------------------------------------------------------------------------------------------------------------------------------------------------------------------------------------------------------------------------------------------------------------------------------------------------------------------------------------------------------------------------------------------------------------------------------------------------------------------------------------------------------------------------------------------------------------------------------------------------------------------------------------------------------------------------------------------------------------------------------------------------------------------------------------------------------------------------------------------------------------------------------------------------------------------------------------------------------------------------------------------------------------------------------------------------------------------------------------------------------------------------------------------------------------------------------------------------------------------------------------------------------------------------------------------------------------------------------------------------------------------------------------------------------------------------------------------------------------------------------------------------------------------------------------------------------------------------------------------------------------------------------------------------------------------------------------------------------------------------------------------------------------------------------------------------------------------------------------------------------------------------------------------------------------------------------------------------------------------------------------------------------------------------------------------------------------------------------------------|
| Sample preparation        | For isolation of immune and stromal cells, lungs were perfused, placed into 5 ml Eppendorf tubes containing 400µl of cold serum-free RPMI and chopped with scissors (1-2 mm). Lung fragments were placed in 2-3 ml of pre-warmed digestion medium (RPMI 1640, 10mM HEPES buffer, 1% penicillin-streptomycin, 1% L-glutamine, liberase (Sigma-Aldrich #05401020001) and 1U/ml DNase I (Sigma-Aldrich #10104159001)) (2-3 ml) and incubated for 30 min at 37°C. After digestion supernatant was collected and cells were resuspended in ice-cold RPMI1640 containing 5% FCS (ThermoFisher #35010CV), 1mM HEPES (Corning #MT25060CI), 1% penicillin-streptomycin (Corning #MT30002CI) and 200mM L-glutamine (Corning #MT25005CI). After additional digestion for 1 hr of the remaining tissue, both digested cell fractions passed through a 100µm strainer (Corning #07-201-432), washed and FACS sorted. For cell isolation from transplanted. KP tumor-bearing mice, tumors were placed into 5 ml Eppendorf tubes containing 400µl of cold serum-free RPMI1640, chopped with scissors, and incubated in digestion medium containing 1 mg/ml collagenase (Sigma #11088793001) and 1U/ml DNase-I (Sigma-Aldrich #10104159001) and beads on a shaker at 37°C for 1 hr. For cytokine production measurements, cells were incubated at 37°C, 5% CO <sub>2</sub> for 3hr in the presence of 50ng/ml phorbol-12-myristate-13-acetate (Sigma-Aldrich #P8139), 500ng/ml ionomycin (Sigma-Aldrich #I0634), 1µg/ml brefeldin A (Sigma-Aldrich #B6542) and 2µM monensin (Sigma-Aldrich #M5273). Cells were stained with Ghost Dye Red 780 (Tonbo #13-0865) or Zombie NIR Flexible Viability Kit (BioLegend #423106) and a mixture of fluorophore-conjugated antibodies for 30 min at 4°C cells, washed and fixed with 1% PFA (Electron Microscopy Sciences #15710). For intracellular staining, cells were fixed and permeabilized with the BD Cytotfix/Cytoperm Kit or with the Thermo Fisher Transcription Factor Fix/Perm Kit according to manufacturers' instructions and analyzed on a BD LSR II flow cytometer or sorted on a BD Aria II flow cytometer. Post-sort cell purity was routinely higher than 95%. |
| Instrument                | Samples were analysed on BD LSR II, Aurora (Cytek), or sorted on a BD Aria II.                                                                                                                                                                                                                                                                                                                                                                                                                                                                                                                                                                                                                                                                                                                                                                                                                                                                                                                                                                                                                                                                                                                                                                                                                                                                                                                                                                                                                                                                                                                                                                                                                                                                                                                                                                                                                                                                                                                                                                                                                                                                                                                          |
| Software                  | Flow cytometry data were collected on an LSR II using Diva v8.0 (BD) or Aurora using SpectroFlo v2.2.0.3 (cytek) and analyzed using FlowJo v 10.6.1 (BD)                                                                                                                                                                                                                                                                                                                                                                                                                                                                                                                                                                                                                                                                                                                                                                                                                                                                                                                                                                                                                                                                                                                                                                                                                                                                                                                                                                                                                                                                                                                                                                                                                                                                                                                                                                                                                                                                                                                                                                                                                                                |
| Cell population abundance | Cells were sorted with <95% purity.                                                                                                                                                                                                                                                                                                                                                                                                                                                                                                                                                                                                                                                                                                                                                                                                                                                                                                                                                                                                                                                                                                                                                                                                                                                                                                                                                                                                                                                                                                                                                                                                                                                                                                                                                                                                                                                                                                                                                                                                                                                                                                                                                                     |
| Gating strategy           | All cells were gated based on FSC-A and SSC-A to exclude debris. Then doublets were excluded by plotting FSC-H vs FSC-W, followed by SSC-H vs SSC-W. Then dead cells were excluded based on live/dead dye negative. CD45 positive and negative cells were gated next. All further gating strategies are illustrated in the supplementary material.                                                                                                                                                                                                                                                                                                                                                                                                                                                                                                                                                                                                                                                                                                                                                                                                                                                                                                                                                                                                                                                                                                                                                                                                                                                                                                                                                                                                                                                                                                                                                                                                                                                                                                                                                                                                                                                      |

- Tick this box to confirm that a figure exemplifying the gating strategy is provided in the Supplementary Information.
